# Supplementary material
Source: Springer Nature journal article supplement (https://www.springermedizin.de/resource/supplementary/13012_2012_584_MOESM1_ESM.pdf/9630342)
Supplement: MOESM1 [file 9630342]

# Canadian CT Head Rule

CT head is only required for minor head injury patients with any one of these findings:

## *High Risk (for Neurological Intervention)*

1. GCS score  $< 15$  at 2 hrs after injury
2. Suspected open or depressed skull fracture
3. Any sign of basal skull fracture\*
4. Vomiting  $\geq 2$  episodes
5. Age  $\geq 65$  years

## *Medium Risk (for Brain Injury on CT)*

6. Amnesia before impact  $\geq 30$  min
7. Dangerous mechanism \*\* (*pedestrian, occupant ejected, fall from elevation*)

### \*Signs of Basal Skull Fracture

- hemotympanum, 'raccoon' eyes, CSF otorrhea/rhinorrhea, Battle's sign

### \*\* Dangerous Mechanism

- pedestrian struck by vehicle
- occupant ejected from motor vehicle
- fall from elevation  $\geq 3$  feet or 5 stairs

### Rule Not Applicable If:

- Non-trauma cases
- GCS  $< 13$
- Age  $< 16$  years
- Coumadin or bleeding disorder
- Obvious open skull fracture
